# Supplementary material for: Sequential detection of hypochlorous acid and sulfur dioxide derivatives by a red-emitting fluorescent probe and bioimaging applications in vitro and in vivo
Source: Royal Society of Chemistry journal article supplement (doi:10.1039/d2ra01048h), 2022-01-01
Supplement: d2ra01048h1.pdf [file d2ra01048h1.pdf]

**Electronic Supplementary Material (ESI) for RSC Advances. This journal is ©  
The Royal Society of Chemistry 2022**

## **Electronic Supplementary Information**

**Sequential detection of hypochlorous acid and sulfur dioxide derivatives by a  
red-emitting fluorescence probe and bioimaging application *in vitro* and *in vivo***

Jianhua Liu,<sup>‡a,c</sup> Haoyuan Yin,<sup>‡a</sup> Zhuye Shang,<sup>a</sup> Pengli Gu,<sup>b</sup> Guangjie He,<sup>b\*</sup> Qingtao  
Meng,<sup>a\*</sup> Run Zhang<sup>d</sup> and Zhiqiang Zhang<sup>a\*</sup>

<sup>a</sup> School of Chemical Engineering, University of Science and Technology Liaoning,  
Anshan, Liaoning Province, 114051, P. R. China.

E-mail: qtmeng@ustl.edu.cn, zzq@ustl.edu.cn; Tel: +86-412-5929627

<sup>b</sup> School of Forensic Medicine, Xinxiang Medical University, 601 Jinsui Road,  
Xinxiang, 453003, Henan Province, P. R. China.

E-mail: guangjiehe@163.com

<sup>c</sup> College of pharmacy, Jilin Medical University, Jilin, Jilin Province, 132001, P. R.  
China.

<sup>d</sup> Australian Institute for Bioengineering and Nanotechnology, The University of  
Queensland, Brisbane, 4072, Australia

<sup>‡</sup> These authors contributed equally to this work and they should be regarded as co-  
first authors.

## **Instruments**

<sup>1</sup>H NMR and <sup>13</sup>C NMR spectra were both collected on an AVANCE600MHZ spectrometer (BRUKER) with chemical shifts reported as *ppm* (in DMSO, TMS as internal standard). Coupling constants (*J* values) are reported in hertz. API mass spectra were recorded on an Agilent 6530 QTOF spectrometer. Absorption spectra were measured with a Perkin Elmer Lambda 900 UV/VIS/NIR spectrophotometer (USA). Fluorescence spectra were measured with Perkin Elmer LS55 luminescence spectrometer (USA). All pH measurements were made with an OHAUS Starter 3100/f meter (USA). Fluorescent live cell images were recorded on a Nikon A1 inverted confocal laser-scanning microscope. Fluorescence imaging in adult zebrafish and mice were imaged by a SPECTRAL Ami Imaging Systems (Spectral Instruments Imaging, LLC, Tucson, AZ) with an excitation filter 465 nm and an emission filter 610 nm. All the data were calculated using the region of interest (ROI) function of Amiview Analysis software (Version 1.7.06), and values are presented as the mean ± SD for each group of three experiments.

## **Materials**

Phenothiazine, 3-hydroxy-3-methylbutanone, malononitrile were purchased from Aladdin reagent Co. (Shanghai, China). 1-Bromopropane, piperidine, phosphorus oxychloride, sodium ethoxide, metal ions (nitrate salts), and anions (sodium salts) were obtained from Sinopharm Chemical Reagent Co., Ltd. (China). 3-Morpholinosydnonimine (SIN-1) (ONOO<sup>-</sup> donor) and sodium hypochlorite (NaOCl) were purchased from Sigma Aldrich. Fetal bovine serum (FBS), L-glutamine,

penicillin, dulbecco's Modified Eagle Medium (DMEM), streptomycin sulfate and trypsin-EDTA were purchased from Life Technologies (Australia). Adult zebrafish and nude mice were commercially available. All the experiments of live zebrafish and nude mice were performed in compliance with the relevant local laws and institute guidelines. Unless otherwise stated, solvents and reagents were of analytical grade from commercial suppliers and were used without further purification. Deionized water was used throughout.

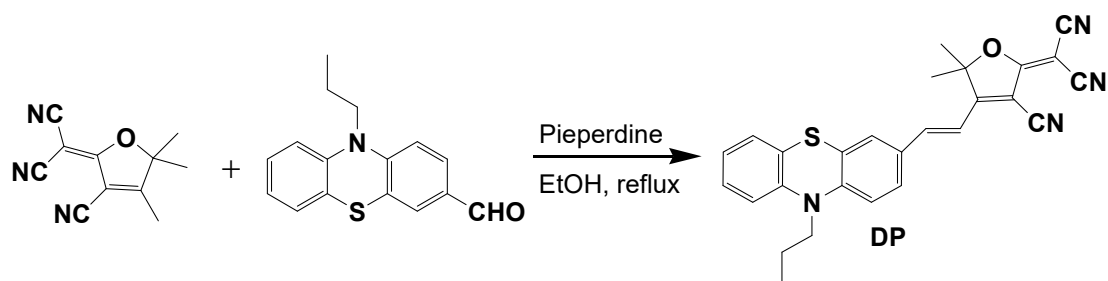

**Scheme S1** Synthetic procedure of the fluorescence probe **DP**.

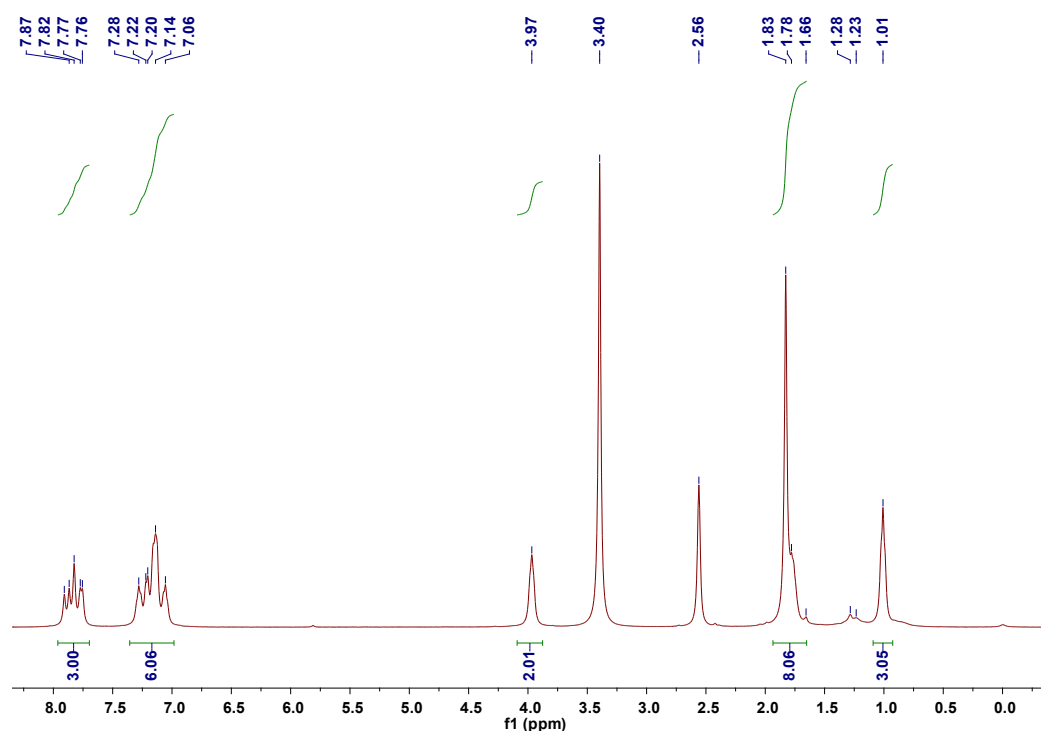

**Fig. S1** <sup>1</sup>H NMR of Probe **DP** (DMSO-*d*<sub>6</sub>).

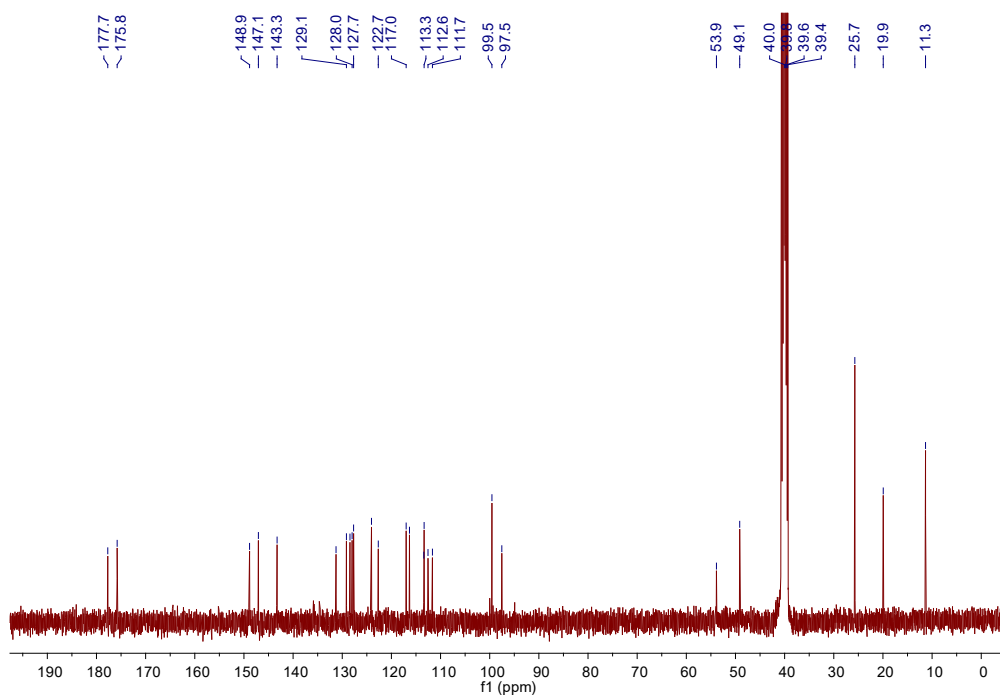

**Fig. S2**  $^{13}\text{C}$  NMR of Probe DP (DMSO- $d_6$ ).

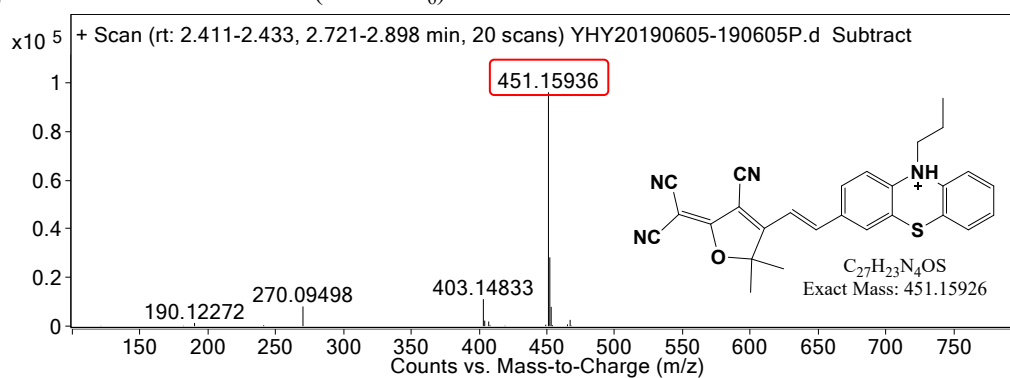

**Fig. S3** HRMS of Probe DP.

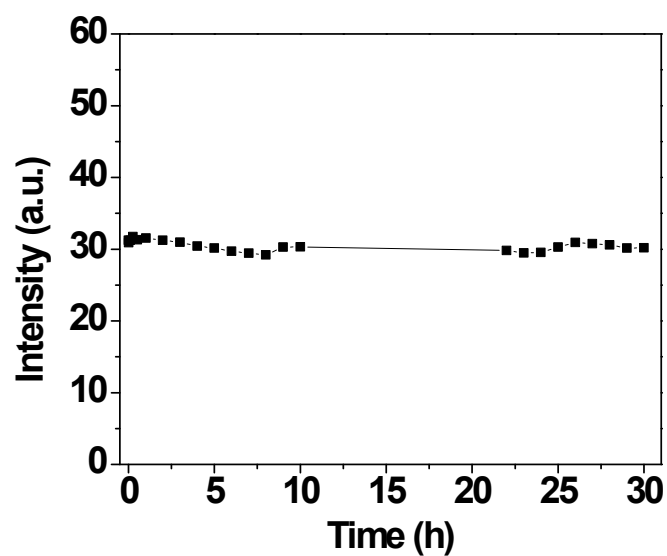

**Fig. S4** Fluorescence spectra of Probe DP (10  $\mu\text{M}$ ) in PBS aqueous buffer (DMF:  $\text{H}_2\text{O}$ =1:9, v:v, 20 mM, pH=7.4). Excitation was performed at 480 nm.

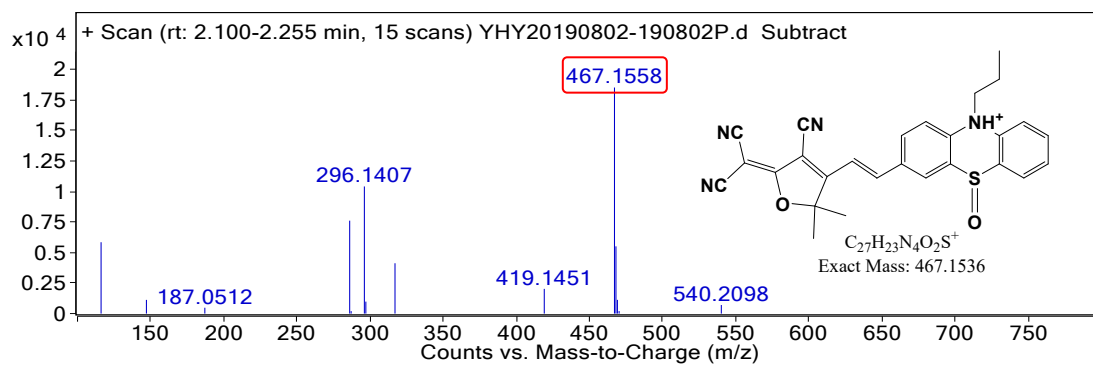

**Fig. S5** HRMS of Probe **DP** in the presence of HOCl.

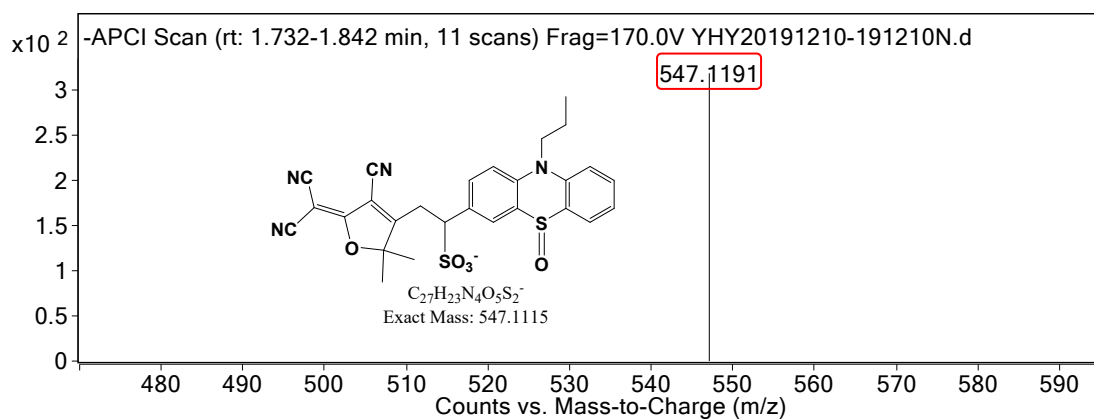

**Fig. S6** HRMS of **DP=O** in the presence of  $HSO_3^-$ .

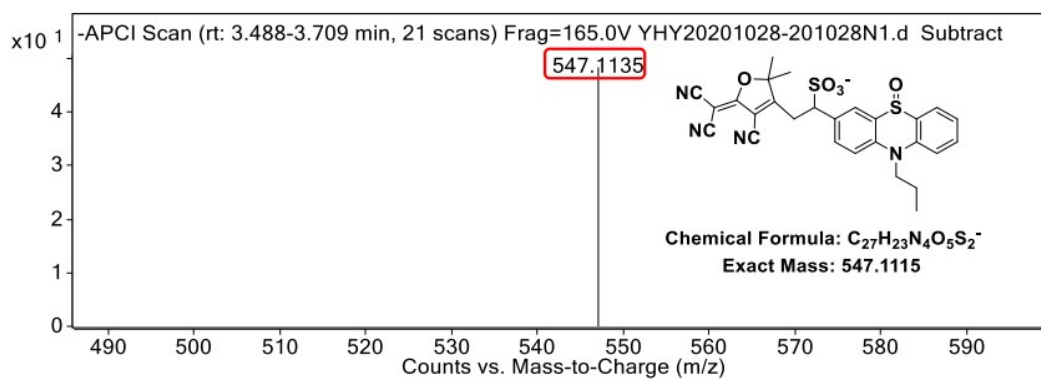

**Fig. S7** HRMS of **DP=O** in the presence of  $SO_3^{2-}$ .

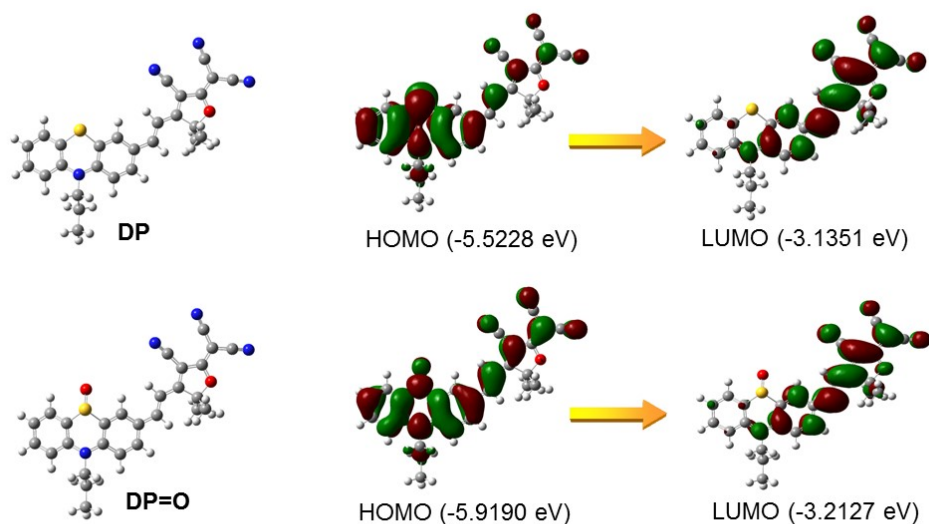

Fig. S8. Theoretical computations of **DP** and **DP=O**. Optimized molecular geometries of **DP** and **DP=O**, HOMO and LUMO orbital distributions, and the corresponding electric energies.

**Table S1.** Cartesian coordinates of **DP** in the ground state ( $S_0$ ).

**Coordinates (ground state  $S_0$ )**

| Center Number | Atomic Number | Forces (Hartrees/Bohr) |              |              |
|---------------|---------------|------------------------|--------------|--------------|
|               |               | X                      | Y            | Z            |
| 1             | 6             | 0.000007314            | 0.000003141  | 0.000000217  |
| 2             | 6             | -0.000013613           | -0.000002267 | -0.000001886 |
| 3             | 6             | 0.000010293            | 0.000004836  | 0.000001392  |
| 4             | 6             | -0.000003409           | -0.000014392 | 0.000000239  |
| 5             | 6             | -0.000001934           | 0.000008541  | 0.0000006157 |
| 6             | 6             | -0.000002990           | -0.000002776 | -0.000002596 |
| 7             | 16            | -0.000000759           | 0.000002844  | 0.000000681  |
| 8             | 6             | 0.000008623            | -0.000014066 | 0.000000347  |
| 9             | 6             | -0.000022911           | 0.000020387  | 0.000013848  |
| 10            | 7             | 0.000018879            | -0.000016558 | -0.000025301 |
| 11            | 6             | -0.000008076           | 0.000003250  | 0.000002226  |
| 12            | 6             | 0.000003719            | 0.000006104  | 0.000001431  |
| 13            | 6             | 0.000000677            | -0.000006693 | 0.000001159  |
| 14            | 6             | -0.000000072           | -0.000003105 | -0.000002030 |
| 15            | 6             | 0.000000289            | 0.000007681  | 0.000013756  |
| 16            | 6             | 0.000000877            | 0.000001753  | -0.000003956 |
| 17            | 6             | 0.000000723            | 0.000000282  | -0.000001018 |
| 18            | 6             | 0.000006371            | 0.000003297  | 0.000001211  |
| 19            | 6             | -0.000005580           | -0.000002852 | -0.000002067 |
| 20            | 6             | 0.000005088            | 0.000001741  | 0.000001102  |
| 21            | 6             | -0.000006079           | -0.000001584 | -0.000000206 |
| 22            | 6             | -0.000015861           | 0.000016490  | -0.000000936 |
| 23            | 8             | 0.000008264            | -0.000010875 | -0.000001272 |
| 24            | 6             | 0.000002936            | -0.000001528 | -0.000001247 |
| 25            | 6             | 0.000004395            | -0.000000149 | 0.000003820  |
| 26            | 6             | 0.000009753            | -0.000002431 | -0.000002037 |
| 27            | 7             | -0.000001142           | 0.000001344  | 0.000002252  |
| 28            | 6             | -0.000002959           | 0.000000098  | -0.000000595 |
| 29            | 6             | -0.000000834           | 0.000000155  | -0.000000698 |

|    |   |              |              |              |
|----|---|--------------|--------------|--------------|
| 30 | 6 | -0.000010588 | 0.000004894  | -0.000009122 |
| 31 | 7 | 0.000001031  | -0.000000221 | 0.000003087  |
| 32 | 6 | 0.000006353  | -0.000001434 | 0.000001645  |
| 33 | 7 | -0.000002022 | 0.000001022  | -0.000000127 |
| 34 | 1 | -0.000001201 | -0.000000333 | -0.000000820 |
| 35 | 1 | -0.000001820 | -0.000000977 | 0.000002092  |
| 36 | 1 | 0.000002074  | 0.000000409  | 0.000000548  |
| 37 | 1 | 0.000001278  | -0.000001049 | 0.000002744  |
| 38 | 1 | -0.000000522 | -0.000001937 | 0.000000655  |
| 39 | 1 | 0.000000624  | 0.000000111  | 0.000001550  |
| 40 | 1 | 0.000001010  | -0.000000491 | 0.000001113  |
| 41 | 1 | -0.000001589 | -0.000002167 | -0.000001506 |
| 42 | 1 | 0.000000083  | -0.000000928 | -0.000000242 |
| 43 | 1 | 0.000000284  | -0.000002002 | 0.000001341  |
| 44 | 1 | 0.000000336  | 0.000000799  | 0.000000678  |
| 45 | 1 | 0.000000308  | -0.000000690 | -0.000000591 |
| 46 | 1 | 0.000000113  | -0.000000258 | -0.000000616 |
| 47 | 1 | 0.000001037  | -0.000000580 | -0.000000311 |
| 48 | 1 | 0.000000389  | 0.000000523  | 0.000001908  |
| 49 | 1 | 0.000000761  | 0.000000905  | -0.000000165 |
| 50 | 1 | -0.000000874 | -0.000001240 | -0.000001323 |
| 51 | 1 | 0.000000792  | -0.000000189 | -0.000000507 |
| 52 | 1 | -0.000000071 | 0.000000823  | -0.000002162 |
| 53 | 1 | 0.000001070  | 0.000001337  | -0.000001276 |
| 54 | 1 | -0.000000604 | 0.000000542  | -0.000001642 |
| 55 | 1 | -0.000000232 | 0.000000461  | -0.000000938 |

**Table S2.** Cartesian coordinates of  $\text{DP}=\text{O}$  in the ground state ( $S_0$ ).

**Coordinates (ground state  $S_0$ )**

| Center Number | Atomic Number | Forces (Hartrees/Bohr) |              |              |
|---------------|---------------|------------------------|--------------|--------------|
|               |               | X                      | Y            | Z            |
| 1             | 6             | -0.000002786           | 0.000001771  | -0.000000558 |
| 2             | 6             | 0.000002557            | -0.000009000 | 0.000004082  |
| 3             | 6             | -0.000010733           | 0.000009478  | -0.000002619 |
| 4             | 6             | 0.000006268            | -0.000025357 | -0.000002134 |
| 5             | 6             | -0.000005350           | 0.000022658  | -0.000004626 |
| 6             | 6             | 0.000007731            | -0.000002873 | 0.000001119  |
| 7             | 16            | -0.000004037           | 0.000018603  | 0.000001748  |
| 8             | 6             | 0.000002492            | -0.000019910 | 0.000003024  |
| 9             | 6             | -0.000004548           | 0.000013891  | 0.000004824  |
| 10            | 7             | -0.000001824           | -0.000009330 | 0.000000322  |
| 11            | 6             | 0.000003981            | 0.000008656  | -0.000000085 |
| 12            | 6             | -0.000000577           | -0.000008860 | 0.000006005  |
| 13            | 6             | -0.000000651           | 0.000004005  | 0.000005882  |
| 14            | 6             | 0.000000157            | -0.000004901 | 0.000001779  |
| 15            | 6             | 0.000002435            | 0.000003880  | -0.000004180 |
| 16            | 6             | -0.000001824           | -0.000000668 | 0.000004354  |
| 17            | 6             | 0.000000691            | -0.000005654 | -0.000004206 |
| 18            | 6             | -0.000000364           | 0.000003762  | -0.000002334 |
| 19            | 6             | 0.000002034            | -0.000001265 | -0.000000017 |
| 20            | 6             | -0.000001256           | 0.000001290  | 0.000001446  |
| 21            | 6             | 0.000003446            | -0.000001233 | 0.000005463  |
| 22            | 6             | 0.000008006            | -0.000001635 | 0.000000593  |
| 23            | 8             | -0.000002365           | 0.000004066  | -0.000001638 |

|    |   |              |              |              |
|----|---|--------------|--------------|--------------|
| 24 | 6 | -0.000003024 | -0.000001331 | -0.000004780 |
| 25 | 8 | 0.000000377  | -0.000000370 | 0.000008179  |
| 26 | 6 | -0.000006603 | -0.000006194 | -0.000000239 |
| 27 | 6 | -0.000006055 | 0.000002424  | 0.000001191  |
| 28 | 7 | -0.000000406 | 0.000000691  | 0.000005499  |
| 29 | 6 | 0.000002628  | -0.000000446 | -0.000000799 |
| 30 | 6 | -0.000000036 | 0.000001780  | -0.000001096 |
| 31 | 6 | 0.000004134  | 0.000003039  | 0.000005606  |
| 32 | 7 | 0.000000714  | -0.000001209 | -0.000002397 |
| 33 | 6 | 0.000001280  | 0.000002343  | 0.000003417  |
| 34 | 7 | -0.000001916 | -0.000000129 | 0.000005150  |
| 35 | 1 | -0.000000046 | 0.000001067  | -0.000003746 |
| 36 | 1 | 0.000001210  | -0.000000115 | 0.000004030  |
| 37 | 1 | 0.000000340  | 0.000003942  | -0.000003165 |
| 38 | 1 | -0.000000428 | -0.000001373 | 0.000007499  |
| 39 | 1 | 0.000001166  | -0.000000559 | 0.000004728  |
| 40 | 1 | 0.000001907  | -0.000002496 | 0.000001844  |
| 41 | 1 | 0.000000373  | -0.000000498 | 0.000000222  |
| 42 | 1 | -0.000005042 | -0.000002258 | -0.000003303 |
| 43 | 1 | 0.000004967  | -0.000001712 | -0.000001626 |
| 44 | 1 | 0.000001005  | -0.000000247 | -0.000002979 |
| 45 | 1 | -0.000000204 | -0.000000218 | -0.000005667 |
| 46 | 1 | 0.000001874  | -0.000001192 | -0.000006410 |
| 47 | 1 | 0.000000042  | 0.000000822  | -0.000005270 |
| 48 | 1 | 0.000000478  | 0.000001484  | -0.000004101 |
| 49 | 1 | -0.000000578 | -0.000000144 | -0.000002501 |
| 50 | 1 | -0.000000566 | 0.000000260  | 0.000000061  |
| 51 | 1 | 0.000001872  | -0.000000842 | -0.000003080 |
| 52 | 1 | 0.000001777  | -0.000002716 | -0.000002359 |
| 53 | 1 | 0.000000666  | -0.000000925 | -0.000003851 |
| 54 | 1 | -0.000001948 | 0.000002045  | -0.000002889 |
| 55 | 1 | -0.000001538 | 0.000001616  | -0.000004158 |
| 56 | 1 | -0.000001898 | 0.000002086  | -0.000001257 |

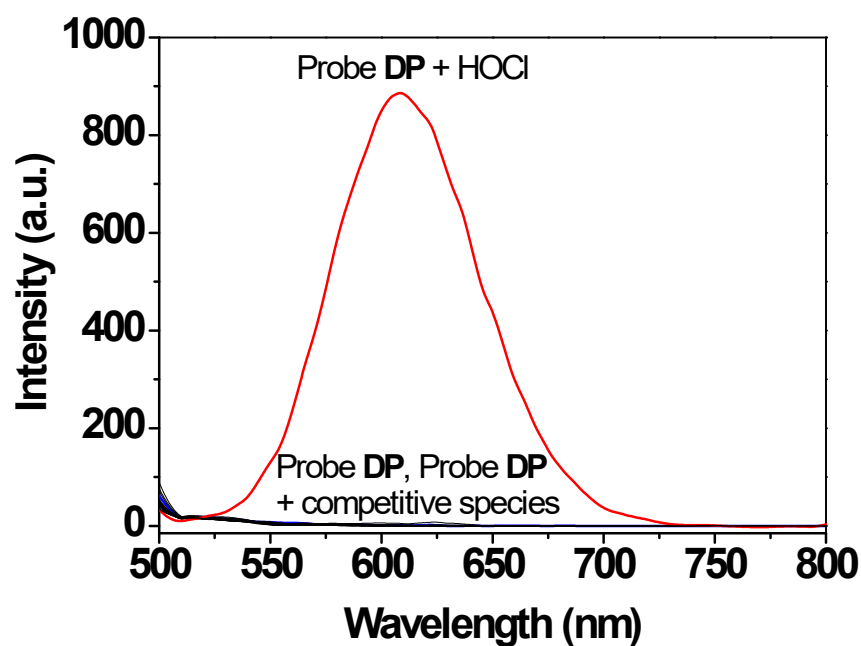



**Fig. S9** Fluorescence responses of Probe **DP** (10  $\mu\text{M}$ ) to various analytes (60  $\mu\text{M}$ ) in PBS aqueous buffer (DMF:  $\text{H}_2\text{O}$ =1:9, v:v, 20 mM, pH=7.4), excitation at 480 nm.

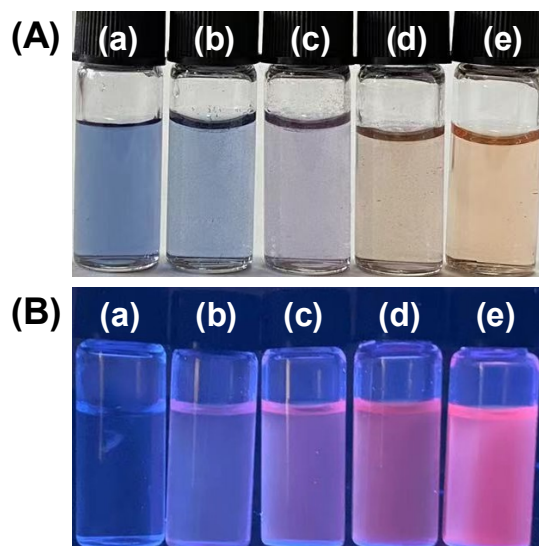

**Fig. S10.** (A) Color responses of **DP** (10  $\mu\text{M}$ ) towards HOCl in PBS aqueous buffer (DMF:H<sub>2</sub>O=1:9, v:v, 20 mM, pH=7.4). (B) Fluorescence color photos of **DP** (10  $\mu\text{M}$ ) in the presence of HOCl in PBS aqueous buffer (DMF:H<sub>2</sub>O=1:9, v:v, 20 mM, pH=7.4) under UV light (365 nm). (a) 0  $\mu\text{M}$ , (b) 10  $\mu\text{M}$ , (c) 20  $\mu\text{M}$ , (d) 40  $\mu\text{M}$ , (e) 60  $\mu\text{M}$ .

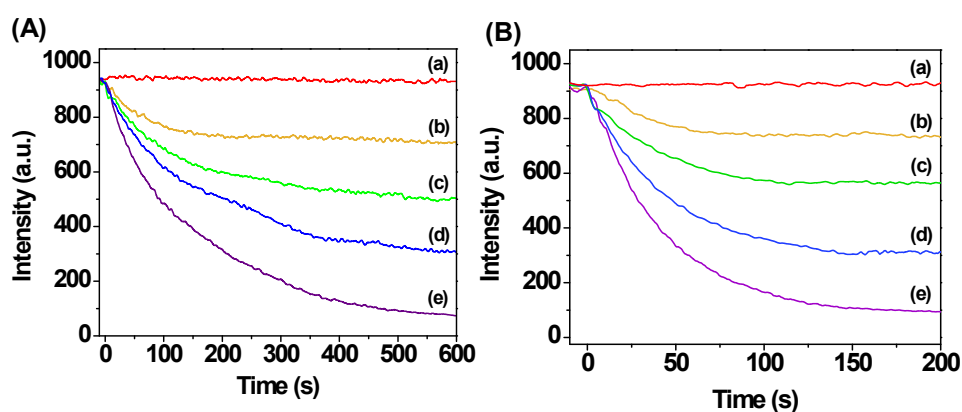

**Fig. S11** (A) Time-profile fluorescence quenching at 608 nm of **DP=O** in the presence of (a) 0  $\mu\text{M}$ , (b) 10  $\mu\text{M}$ , (c) 15  $\mu\text{M}$ , (d) 20  $\mu\text{M}$ , (e) 30  $\mu\text{M}$   $\text{SO}_3^{2-}$  in PBS aqueous buffer (DMF:  $\text{H}_2\text{O}$ =1:9, v:v, 20 mM, pH=7.4). (B) Time-profile fluorescence quenching at 608 nm of **DP=O** in the presence of (a) 0  $\mu\text{M}$ , (b) 10  $\mu\text{M}$ , (c) 20  $\mu\text{M}$ , (d) 30  $\mu\text{M}$ , (e) 50  $\mu\text{M}$   $\text{HSO}_3^-$  in PBS aqueous buffer (DMF:  $\text{H}_2\text{O}$ =1:9, v:v, 20 mM, pH=7.4). Excitation was performed at 480 nm.

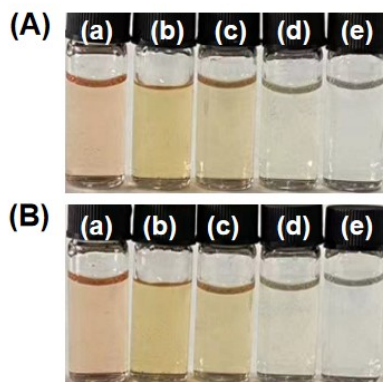

**Fig. S12.** Color responses of **DP=O** (10  $\mu\text{M}$ ) towards different concentrations of (A)  $\text{SO}_3^{2-}$  and (B)  $\text{HSO}_3^-$  in PBS aqueous buffer (DMF:H<sub>2</sub>O=1:9, v:v, 20 mM, pH=7.4). (a) 0  $\mu\text{M}$ , (b) 10  $\mu\text{M}$ , (c) 20  $\mu\text{M}$ , (d) 30  $\mu\text{M}$  and (e) 40  $\mu\text{M}$ .

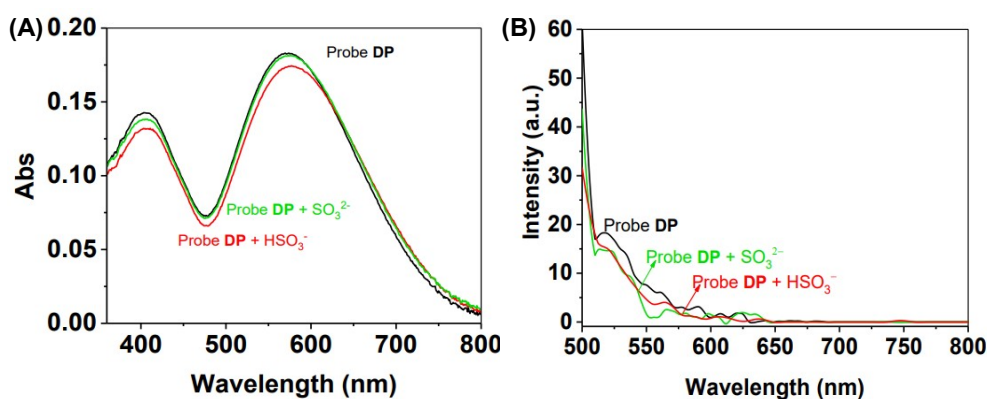

**Fig. S13** (A) UV-vis absorption and (B) emission spectra of **DP** (10  $\mu\text{M}$ ) in the presence amounts of  $\text{SO}_3^{2-}$  (60  $\mu\text{M}$ ) and  $\text{HSO}_3^-$  (60  $\mu\text{M}$ ) in PBS aqueous buffer (DMF: H<sub>2</sub>O=1:9, v:v, 20 mM, pH=7.4).

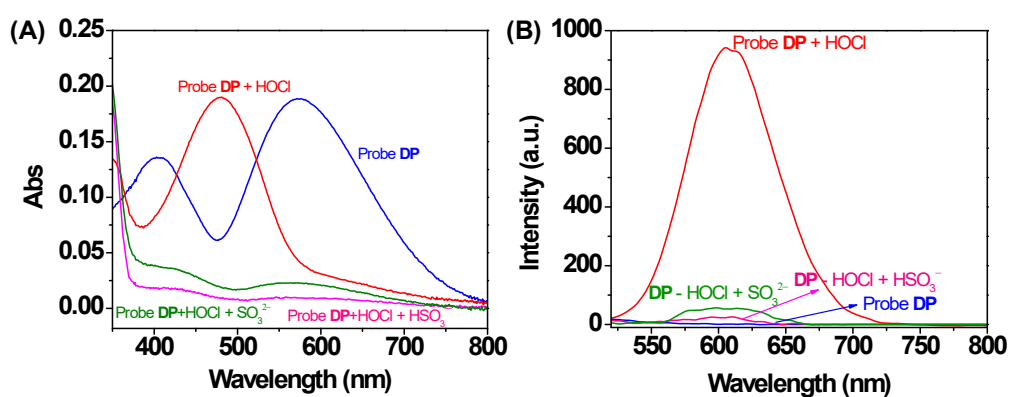

**Fig. S14** (A) UV-vis absorption and (B) emission spectra of Probe **DP** (10  $\mu\text{M}$ ) to **HOCl** (60  $\mu\text{M}$ ) and **DP=O** to  $\text{SO}_3^{2-}$  (60  $\mu\text{M}$ ) and  $\text{HSO}_3^-$  (60  $\mu\text{M}$ ) in PBS aqueous buffer (DMF: H<sub>2</sub>O=1:9, v:v, 20 mM, pH=7.4). Excitation at 480 nm.

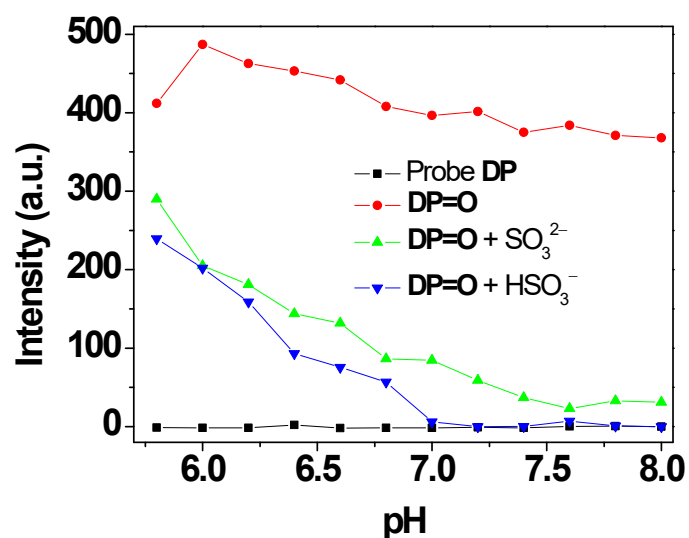

Fig. S15 Fluorescence spectra of DP=O (10  $\mu$ M) upon the addition SO<sub>3</sub><sup>2-</sup> (60  $\mu$ M) and HSO<sub>3</sub><sup>-</sup> (60  $\mu$ M) in PBS aqueous buffer (DMF: H<sub>2</sub>O=1:9, v:v, 20 mM, pH=7.4). Excitation at 480 nm.

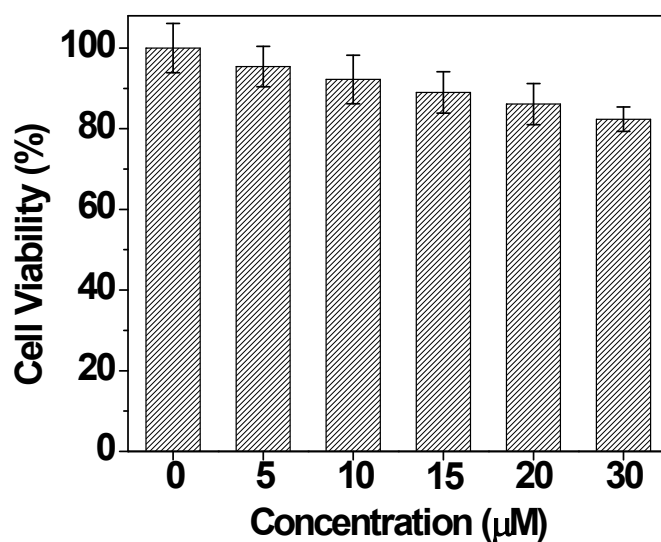

Fig. S16 The viability of A549 cells incubated with DP (0-30  $\mu$ M) for 24 h.

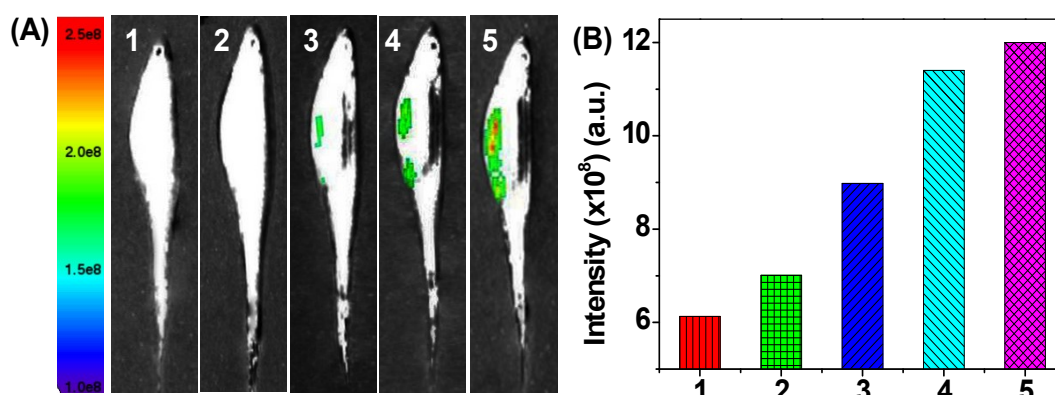

Fig. S17 (A) Fluorescence imaging of endogenous HOCl production in zebrafish. (a) Zebrafish only; (b) Zebrafish was stimulated with LPS (2  $\mu$ L/mL) for 3 h; then stained with DP (10  $\mu$ M) for

(c) 5 min (d) 10 min (e) 15 min. (B) The mean fluorescence intensities of areas of interest at different time period showing in (a-e). The zebrafish were imaged with an excitation filter (465 nm) and the emission filter (610 nm). Zebrafish were imaged with an excitation filter (465 nm) and an emission filter (610 nm).

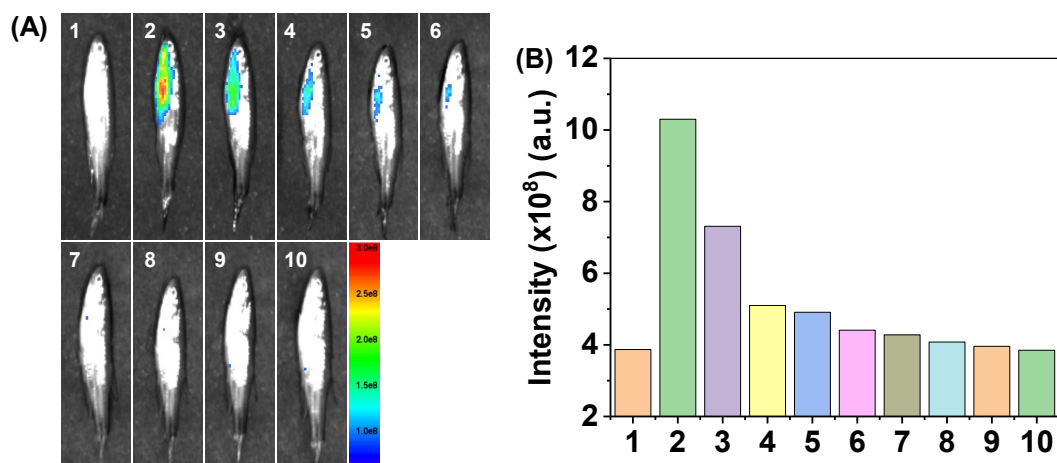

**Fig. S18** (A) Fluorescence imaging of exogenous  $\text{HSO}_3^-$  in zebrafish. (1) Zebrafish only; (2) zebrafish was stimulated with  $\text{DP=O}$  ( $10 \mu\text{M}$ ) for 0.5 h, (3) then stained with  $\text{HSO}_3^-$  ( $40 \mu\text{M}$ ) for 5 min, (4) 10 min, (5) 15 min, (6) 20 min, (7) 25 min, (8) 30 min, (9) 35 min and (10) 40 min, respectively. (B) The mean fluorescence intensities of areas of interest at different time showing in (1-10). Zebrafish were imaged with an excitation filter (465 nm) and an emission filter (610 nm).

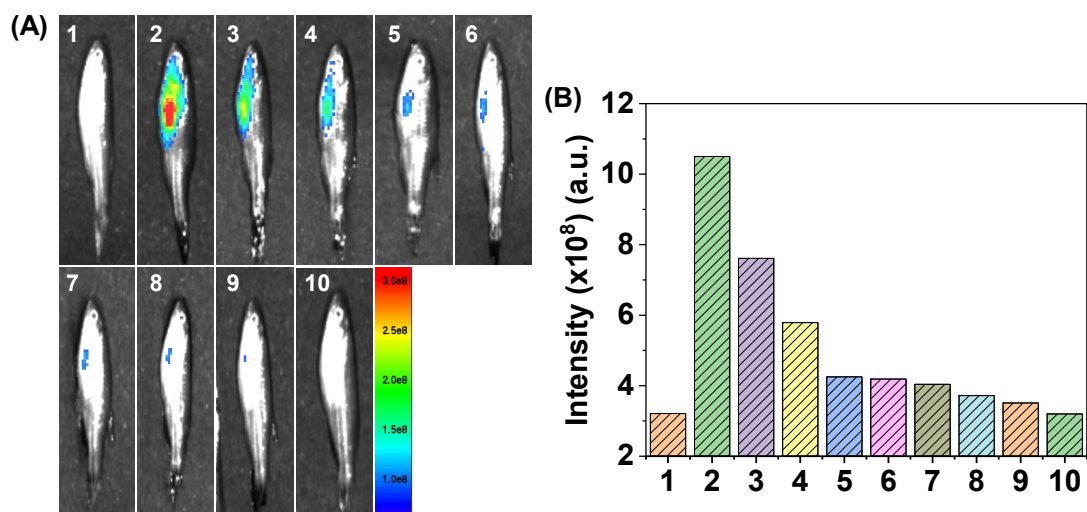

**Fig. S19** (A) Fluorescence imaging of exogenous  $\text{SO}_3^{2-}$  in zebrafish. (1) Zebrafish only; (2) zebrafish was stimulated with  $\text{DP=O}$  ( $10 \mu\text{M}$ ) for 0.5 h, (3) then stained with  $\text{SO}_3^{2-}$  ( $40 \mu\text{M}$ ) for 5 min, (4) 10 min, (5) 15 min, (6) 20 min, (7) 25 min, (8) 30 min, (9) 35 min and (10) 40 min, respectively. (B) The mean fluorescence intensities of areas of interest at different time showing in (1-10). Zebrafish were imaged with an excitation filter (465 nm) and an emission filter (610 nm).

**Table S3.** Comparison of this work with reported fluorescent probes for the detection of HOCl and dioxide derivatives ( $\text{SO}_3^{2-}/\text{HSO}_3^-$ ).

| <b>Probes</b>   | Emission wavelength | Detection of HOCl or dioxide derivatives | Detection limits             | Response time | Application in live cells/ animals     | Ref. |
|-----------------|---------------------|------------------------------------------|------------------------------|---------------|----------------------------------------|------|
| <b>MXS</b>      | 654 nm              | HOCl                                     | 72 nM                        | 30 s          | HeLa cells.                            | 1    |
| <b>Probe 1</b>  | 520 nm              | HOCl/GSH                                 | 0.237 $\mu\text{M}$ for HOCl | within 2 min  | HeLa cells                             | 2    |
| <b>BNA-HCIO</b> | 510 nm              | HOCl                                     | 37.56 nM                     | <30 s         | HOCl                                   | 3    |
| <b>HCIO-ER</b>  | 556 nm              | HOCl                                     | 0.785 $\mu\text{M}$          | 155 s         | HeLa, Raw 264.7 cells and liver tissue | 4    |
| <b>RT-1</b>     | 587 nm              | HOCl                                     | $2.18 \times 10^{-9}$ M      | within 3 min  | RAW 264.7 cells                        | 5    |
| <b>Cou-HOCI</b> | 510 nm              | HOCl                                     | 16 nM                        | within 5 s.   | A549, HeLa and HepG 2 cells            | 6    |
| <b>JBD</b>      | 607 nm              | HOCl                                     | 0.067 $\mu\text{M}$          | within 26 s   | HeLa cells                             | 7    |
| <b>MBTC</b>     | 690 nm              | HOCl                                     | 4.6 nM                       | one minute    | RAW 264.7 cells                        | 8    |
| <b>HDI-HCIO</b> | 520 nm              | HOCl                                     | 8.3 nM                       | within 8 s    | HeLa, and RAW 264.7 cells              | 9    |
| <b>QPCT</b>     | 537 nm/590 nm       | $\text{HSO}_3^-$                         | 0.44 $\mu\text{M}$           | 7 min         | A549 cells                             | 10   |
| <b>PCPT</b>     | 568 nm/648 nm       | $\text{HSO}_3^-$                         | 80.5 nM                      | 15 min        | HeLa cells, L-O2 cells and HepG2 cells | 11   |
| <b>BCVTI</b>    | 608 nm              | $\text{HSO}_3^-$                         | 3.3 nM                       | 4 min         | No                                     | 12   |
| <b>HDI</b>      | 460 nm/565 nm       | $\text{HSO}_3^-$                         | 80 nM                        | 2 min         | MCF-7 cells                            | 13   |
| <b>DQ</b>       | 620 nm              | $\text{HSO}_3^-$                         | 0.11 $\mu\text{M}$           | 15 s          | HepG2 cells                            | 14   |
| <b>CMQ</b>      | 640 nm              | $\text{HSO}_3^-$                         | 15.6 nM                      | 5 s           | HeLa cells, Zebrafish                  | 15   |
| <b>probe 1</b>  | 450 nm/594 nm       | $\text{HSO}_3^-$                         | 3.21 $\mu\text{M}$           | 2.5 min       | No                                     | 16   |
| <b>Ru-azo</b>   | 635 nm              | $\text{HSO}_3^-$                         | 0.69 $\mu\text{M}$           | 60 min        | No                                     | 17   |
| <b>MITO-TPE</b> | 455 nm              | $\text{HSO}_3^-$                         | 27.22 $\mu\text{M}$          | 20 s          | MCF-7 Cells, Zebrafish                 | 18   |
| <b>Hcy-Mo</b>   | 596 nm              | $\text{HSO}_3^-$                         | 80 nM                        | 30 s          | MDA-MB-231 cells, Mouse                | 19   |

|                   |                                                         |                                            |                                               |                                                            |                                      |                  |
|-------------------|---------------------------------------------------------|--------------------------------------------|-----------------------------------------------|------------------------------------------------------------|--------------------------------------|------------------|
| <b>RBC</b>        | 456 nm/583 nm                                           | $\text{HSO}_3^-$                           | $6.6 \times 10^{-8}$ M                        | 35 s                                                       | HeLa and HepG2 cells                 | 20               |
| <b>Q5</b>         | 485 nm/650 nm                                           | $\text{HSO}_3^-$                           | 89 nM                                         | within 0.5 h                                               | CEM cells                            | 21               |
| <b>BPyn</b>       | 512 nm/704 nm                                           | $\text{HSO}_3^-$                           | 0.09 $\mu\text{M}$                            | 15 s                                                       | HeLa cells                           | 22               |
| <b>Probe PBC1</b> | 458 nm/610 nm                                           | HOCl and $\text{SO}_2$                     | 13 nM, 7 nM                                   | within 20 s                                                | HeLa cells, 3-day-old zebrafish      | 23               |
| <b>DNB</b>        | 525 nm/600 nm for HOCl; 425 nm/600 nm for $\text{SO}_2$ | HOCl and $\text{SO}_2$                     | 8.0 nM for $\text{SO}_2$ and 15.2 nM for HOCl | $\text{SO}_2 < 50$ s, HOCl < 20 s                          | HeLa cells, zebrafish                | 24               |
| <b>DP</b>         | 608 nm                                                  | HOCl and $\text{SO}_3^{2-}/\text{HSO}_3^-$ | 89.5 nM, 70.8 nM/65.1 nm                      | 30 s for HOCl, 600 s for $\text{SO}_3^{2-}/\text{HSO}_3^-$ | Live HeLa cells, zebrafish and mouse | <b>This work</b> |

## References:

1. J. Gong, C. Liu, S. Cai, S. He, L. Zhao and X. Zeng, Novel near-infrared fluorescent probe with a large Stokes shift for sensing hypochlorous acid in mitochondria. *Org. Biomol. Chem.*, 2020, **18**, 7656–7662.
2. C. Jiao, Y. Liu, W. Lu, P. Zhang, X. Ma and Y. Wang, A simple sensor based on 1,8-naphthalimide with large Stokes shift for detection of hypochlorous acid in living cells. *RSC Adv.*, 2019, **9**, 31196–31201.
3. W. Hu, M. Zhao, K. Gu, L. Xie, M. Liu and D. Lu, Fluorescent probe for the detection of hypochlorous acid in water samples and cell models. *RSC Adv.*, 2022, **12**, 777–784.
4. W. Zhang, W. Song and W. Lin, A novel ER-targeted two-photon fluorescent probe for monitoring abnormal concentrations of HClO in diabetic mice. *J. Mater. Chem. B*, 2021, **9**, 7381–7385.
5. M. G. Choi, Y. J. Lee, K. M. Lee, K. Y. Park, T. Jung Park and S.-K. Chang, A simple hypochlorous acid signaling probe based on resorufin carbonodithioate and its biological application. *Analyst*, 2019, **144**, 7263–7269.
6. Z. Xu, X. Wang, T. Duan, R. He, F. Wang and X. Zhou, Development of an ultrafast fluorescent probe for specific recognition of hypochlorous acid and its application in live cells. *RSC Adv.*, 2021, **11**, 24669–24672.
7. H. Ren, F. Huo and C. Yin, An ESIPT-based colorimetric and fluorescent probe with large Stokes shift for the sensitive detection of hypochlorous acid and its bioimaging in cells. *New J. Chem.*, 2021, **45**, 4724–4728.
8. J. Sun and F. Feng, An S-alkyl thiocarbamate-based biosensor for highly sensitive and selective detection of hypochlorous acid. *Analyst*, 2018, **143**, 4251–4255

9. P. Luo and X. Zhao, A Sensitive and Selective Fluorescent Probe for Real-Time Detection and Imaging of Hypochlorous Acid in Living Cells. *ACS Omega*, 2021, **6**, 12287–12292.
10. J. Lia, Y. Gao, H. Guo, X. Li, H. Tang, J. Li and Y. Guo, A novel colorimetric and ratiometric fluorescent probe for selective detection of bisulfite in real samples and living cells. *Dyes Pigments*, 2019, **163**, 285-290.
11. W.-X. Sun, N. Li, Z.-Y. Li, Y.-C. Yuan, J.-Y. Miao, B.-X. Zhao and Z.-M. Lin, A mitochondria-targeted ratiometric fluorescence probe for detection of SO<sub>2</sub> derivatives in living cells. *Dyes Pigments*, 2020, **182**, 108658.
12. F. Li, L. Zou, J. Xu, F. Liu, X. Zhang, H. Li, G. Zhang and X. Duan, A high-performance colorimetric fluorescence sensor based on Michael addition reaction to detect HSO<sub>3</sub><sup>-</sup> in real samples. *J. Photoch. Photobio. A*, 2021, **411**, 113201.
13. L. Wang, W. Yang, Y. Song, Y. Gu and Y. Hu, A double-indole structure fluorescent probe for monitoring sulfur dioxide derivatives with distinct ratiometric fluorescence signals in mammalian cells. *Spectrochim. Acta A*, 2020, **225**, 117495.
14. C. Zhang, L. Han, Q. Liu, M. Liu, B. Gu and Y. Shen, A colorimetric and far-red fluorescent probe for rapid detection of bisulfite/sulfite in full water-soluble based on biquinolinium and its applications. *Spectrochim. Acta A*, 2021, **253**, 119561.
15. X. Bao, X. Cao, Y. Yuan, B. Zhou and C. Huo, Ultrafast Detection of Sulfur Dioxide Derivatives by a Distinctive “Dual-Positive-Ion” Platform that Features a Doubly Activated but Irreversible Michael Addition Site. *J. Agric. Food Chem.*, 2021, **69**, 4903–4910.
16. X. Mu, J. Zhu, L. Yan and N. Tang, A ratiometric fluorescent probe for the rapid and specific detection of HSO<sub>3</sub><sup>-</sup> in water samples. *Luminescence*, 2021, **36**, 923–927.
17. W. Zhang, X. Xi, Y.-L. Wang, Z. Du, C. Liu, J. Liu, B. Song, J. Yuan and R. Zhang, Responsive ruthenium complex probe for phosphorescence and time-gated luminescence detection of bisulfite. *Dalton Trans.*, 2020, **49**, 5531–5538.
18. X. Yang, J. Tang, D. Zhang, X. Han, J. Liu, J. Li, Y. Zhao and Y. Ye, An AIE probe for imaging mitochondrial SO<sub>2</sub>- induced stress and SO<sub>2</sub> levels during heat stroke. *Chem. Commun.*, 2020, **56**, 13217–13220.
19. R. Zhou, G. Cui, Y. Hu, Q. Qi, W. Huang and L. Yang, An effective biocompatible fluorescent probe for bisulfite detection in aqueous solution, living cells, and mice. *RSC Adv.*, 2020, **10**, 25352–25357.
20. D. Yang, X.-Y. He, X.-T. Wu, H.-N. Shi, J.-Y. Miao, B.-X. Zhao and Z.-M. Lin, A novel mitochondria-targeted ratiometric fluorescent probe for endogenous sulfur dioxide derivatives as a cancer-detecting tool. *J. Mater. Chem. B*, 2020, **8**, 5722–5728.
21. J. Zhu, F. Qin, D. Zhang, J. Tang, W. Liu, W. Cao and Y. Ye, A novel NIR fluorescent probe for the double-site and ratiometric detection of SO<sub>2</sub> derivatives and its applications. *New J. Chem.*, 2019, **43**, 16806–16811.
22. U. Tamima, M. Santra, C. W. Song, Y. J. Reo and K. H. Ahn, A Benzopyronin-Based Two-Photon Fluorescent Probe for Ratiometric Imaging of Lysosomal Bisulfite with Complete

---

Spectral Separation. *Anal. Chem.*, 2019, **91**, 10779–10785.

23. J. Han, S. Yang, B. Wang and X. Song, Tackling the Selectivity Dilemma of Benzopyrylium–Coumarin Dyes in Fluorescence Sensing of HClO and SO<sub>2</sub>. *Anal. Chem.*, 2021, **93**, 5194–5200.
24. K. Dou, G. Chen, F. Yu, Z. Sun, G. Li, X. Zhao, L. Chen and J. You, A two-photon ratiometric fluorescent probe for the synergistic detection of the mitochondrial SO<sub>2</sub>/HClO crosstalk in cells and *in vivo*. *J. Mater. Chem. B*, 2017, **5**, 8389–8398.
